# Supplementary material for: A randomized clinical trial of behavioral activation and exposure-based therapy for adults with generalized anxiety disorder
Source: PubMed Central journal article supplement — J Mood Anxiety Disord. Author manuscript; Available in PMC 2024 Feb 21. (PMC10881118; doi:10.1016/j.xjmad.2023.100004), 2023-06-09
Supplement: NIHMS1958425-supplement-Corrigendum.pdf [file NIHMS1958425-supplement-Corrigendum.pdf]

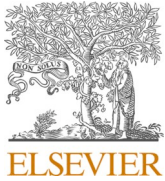Contents lists available at [ScienceDirect](https://www.sciencedirect.com)

## Journal of Mood &amp; Anxiety Disorders

journal homepage: [www.journals.elsevier.com/journal-of-mood-and-anxiety-disorders](http://www.journals.elsevier.com/journal-of-mood-and-anxiety-disorders)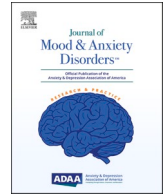

## Corrigendum

## Corrigendum to “A randomized clinical trial of behavioral activation and exposure-based therapy for adults with generalized anxiety disorder” [J. Mood Anxiety Disord., vol. 1, June 2023, 100004]

Hannah Berg<sup>a</sup>, Elisabeth Akeman<sup>a</sup>, Timothy J. McDermott<sup>a,b</sup>, Kelly T. Cosgrove<sup>a,b</sup>, Namik Kirlic<sup>a</sup>, Ashley Clausen<sup>c</sup>, Mallory Cannon<sup>a</sup>, Hung-Wen Yeh<sup>d,e</sup>, Evan White<sup>a,f</sup>, Wesley K. Thompson<sup>g</sup>, Emily M. Choquette<sup>a</sup>, Cassandra A. Sturycz-Taylor<sup>a</sup>, Gabe Cochran<sup>a</sup>, Sam Ramirez<sup>a</sup>, Christopher R. Martell<sup>h</sup>, Kate B. Wolitzky-Taylor<sup>i</sup>, Michelle G. Craske<sup>i</sup>, James L. Abelson<sup>j</sup>, Martin P. Paulus<sup>a,f</sup>, Robin L. Aupperle<sup>a,f</sup>

<sup>a</sup> Laureate Institute for Brain Research, 6655 South Yale Ave, Tulsa, OK 74136, USA

<sup>b</sup> Department of Psychology, University of Tulsa, 800 South Tucker Drive, Tulsa, OK 74104, USA

<sup>c</sup> St. Vincent Hospital, Billings, 1233 N 30th St, Billings, MT 59101, USA

<sup>d</sup> Health Services & Outcomes Research, Children's Mercy Hospital, 2401 Gillham Road, Kansas City, MO 64108, USA

<sup>e</sup> Department of Pediatrics, School of Medicine, University of Missouri-Kansas City, 2411 Holmes Street, Kansas City, MO 64108, USA

<sup>f</sup> Department of Community Medicine, University of Tulsa, 1215 South Boulder Ave W, Tulsa, OK 74119, USA

<sup>g</sup> Family Medicine and Public Health, UC San Diego, 9500 Gilman Dr., La Jolla, CA 92093, USA

<sup>h</sup> Department of Psychological and Brain Sciences, University of Massachusetts-Amherst, 135 Hicks Way, Amherst, MA 01003, USA

<sup>i</sup> Psychology, Psychiatry and Biobehavioral Sciences, University of California, Los Angeles, 405 Hilgard Avenue, Los Angeles, CA 90077, USA

<sup>j</sup> Department of Psychiatry, University of Michigan, 1500 E Medical Center Dr, Ann Arbor, MI 48109, USA

The authors regret that the grant number currently listed in the acknowledgement section is incorrect. The first sentence of the Acknowledgments should read: "This work was supported by the National

Institute of Mental Health (grant number K23MH108707)".

The authors would like to apologise for any inconvenience caused.

DOI of original article: <https://doi.org/10.1016/j.xjmad.2023.100004>.

E-mail address: [raupperle@laureateinstitute.org](mailto:raupperle@laureateinstitute.org) (R.L. Aupperle).

<https://doi.org/10.1016/j.xjmad.2023.100044>

2950-0044/© 2023 The Author(s). Published by Elsevier Inc. on behalf of Anxiety and Depression Association of America. All rights reserved.
